# Supplementary material for: A QoS-aware routing algorithm based on ant-cluster in wireless multimedia sensor networks
Source: Springer Nature journal article supplement (doi:10.1007/s11432-013-4940-4), 2014-01-08
Supplement: 11432_2013_4940_MOESM1_ESM.pdf [file 11432_2013_4940_MOESM1_ESM.pdf]

中文题目：无线多媒体传感网中基于蚁群分簇的QoS感知路由算法

摘要：本文综合考量了无线多媒体传感网中多个路由指标及其数据包特征，构建了QoS感知路由模型。在此基础上，首先提出了二维平面路由算法IPACR，其通过优化经典蚁群算法中信息素的初始分布达到了加快算法收敛性的效果；其次，为了更适合于大规模的无线传感网，基于IPACR提出了分簇路由算法ICACR；最终，理论分析、仿真实验和真实视频流的实测均表明，相比于IPACR和经典蚁群算法等，ICACR在网络生命周期和各项QoS指标上更具优势。

关键词：蚁群 分簇 多路径 QoS感知路由算法 无线多媒体传感网

创新点：

1. 综合考量多个QoS指标和特征，构建了无线多媒体传感网的QoS感知路由模型。
2. 将多媒体数据帧划分优先级，通过优化人造信息素的初始分布提出了改进的IPACR及基于分簇的ICACR等蚁群算法。
3. 通过真实视频流的实测实验来验证算法的有效性。
